# Supplementary material for: Design of an in-house ambient pressure AP-XPS using a bench-top X-ray source and the surface chemistry of ceria under reaction conditions
Source: Royal Society of Chemistry journal article supplement (doi:10.1039/c2cc17715c), 2012-01-01
Supplement: c2cc17715c.pdf [file c2cc17715c.pdf]

*Supplementary information*

## Design of A New *In-House* Ambient Pressure XPS and Surface Chemistry of Ceria under Reaction Conditions

Franklin (Feng) Tao\*

Department of Chemistry and Biochemistry, University of Notre Dame, Notre Dame, IN 46556

### 1. CAD drawing and photo of the *in-house* ambient pressure system (AP-XPS)

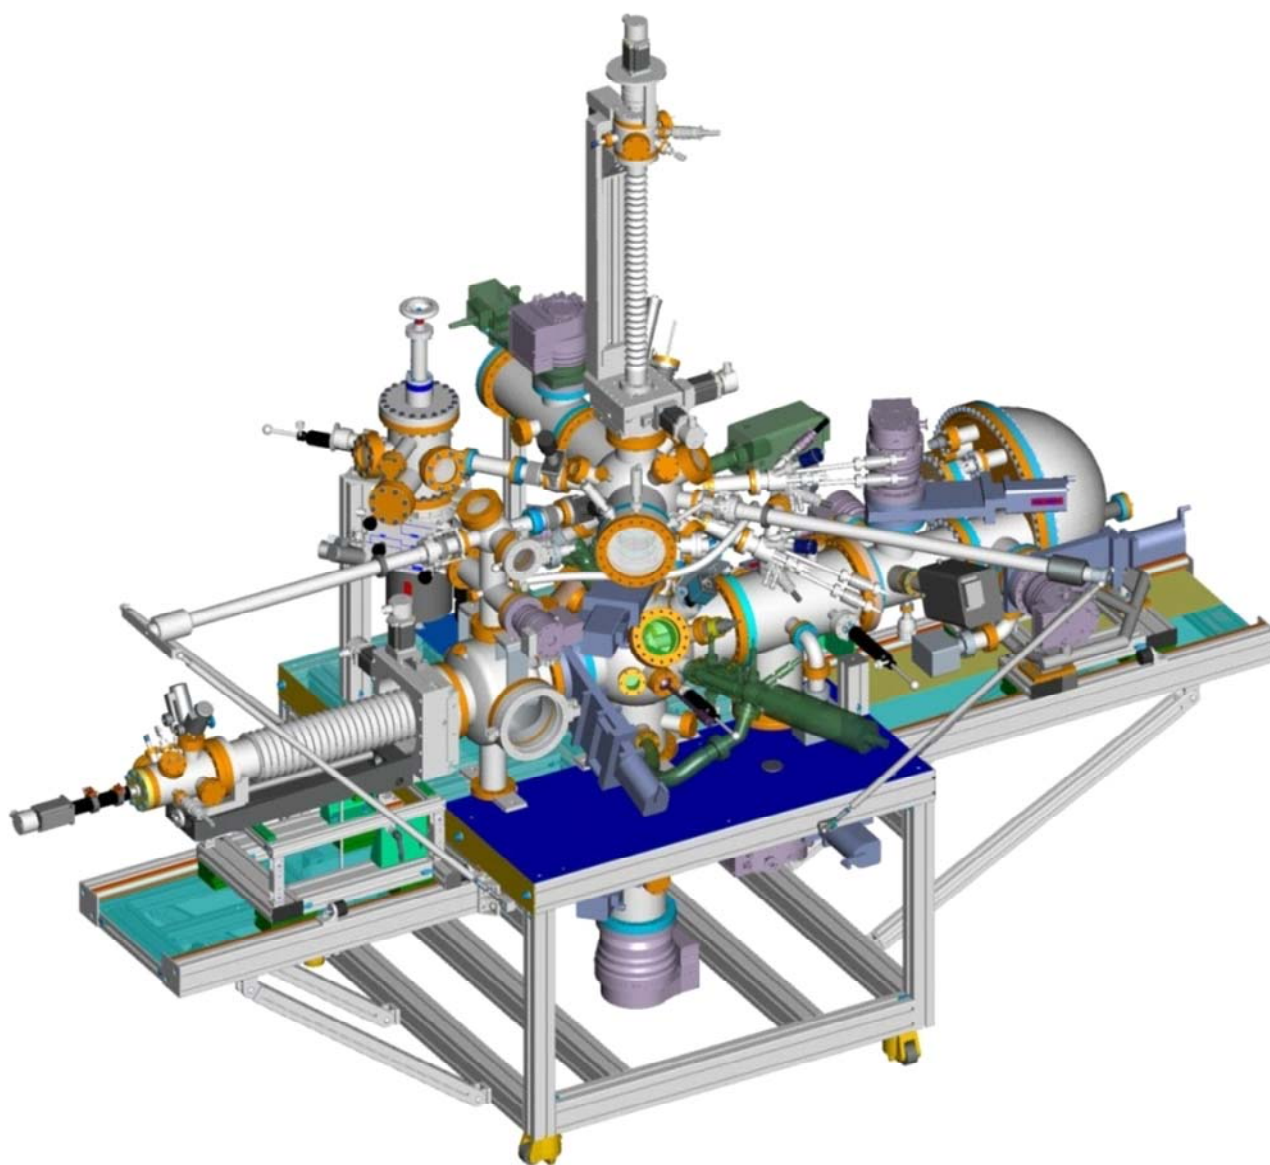

*Fig. S1 CAD drawing of the in-house ambient pressure system reported here.*

## 2. Reaction cell of the *in-house* ambient pressure system (AP-XPS)

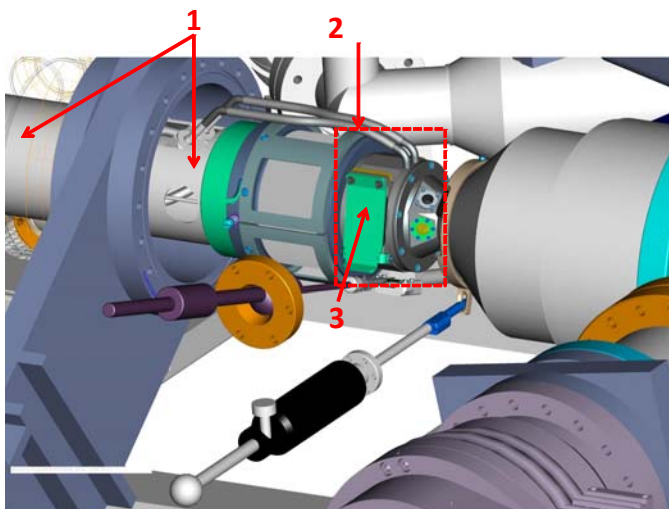

**Fig. S2** Representation of Fig. 3a with details. 1: Manipulator of the reaction cell for operando studies; 2: The reaction cell; 3: Door to lock the reaction cell or change samples.

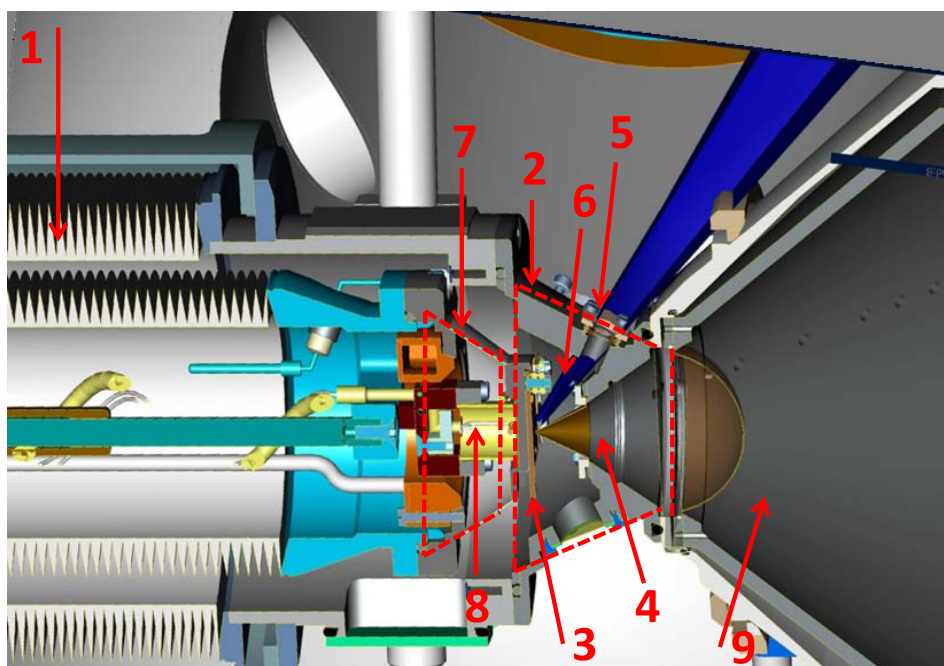

**Fig. S3** Representation of Fig. 3b with details. 1: Manipulator of the reaction cell for operando studies; 2: The reaction cell; 3: The sample stage in gaseous environment of reactants; 4: Nozzle; 5: Si<sub>3</sub>N<sub>4</sub> window for X-ray transmission; 6: X-ray reaches sample surface; 7: UHV cavity to keep e-beam heater; 8: Filament of electron beam heater in UHV; 9: First differential pumping stage.
